# Supplementary material
Source: PubMed Central journal article supplement (PMC4375722)
Supplement: mmc1.pdf [file mmc1.pdf]

## Supporting Material

### Computational and functional analyses of a small-molecule binding site in ROMK

Daniel R. Swale<sup>1,2</sup>, Jonathan H. Sheehan<sup>3,4</sup>, Sreedatta Banerjee<sup>1</sup>, Afeef S. Husni<sup>1</sup>, Thuy T. Nguyen<sup>1</sup>, Jens Meiler<sup>2,3</sup>, Jerod S. Denton<sup>1,2,5,6</sup>

Department of Anesthesiology<sup>1</sup>, Department of Pharmacology<sup>2</sup>, Center for Structural Biology<sup>3</sup>, Department of Biochemistry<sup>4</sup>, Institute of Chemical Biology<sup>5</sup>, Institute for Global Health<sup>6</sup>, Vanderbilt University Medical Center, Nashville, TN 37232, United States

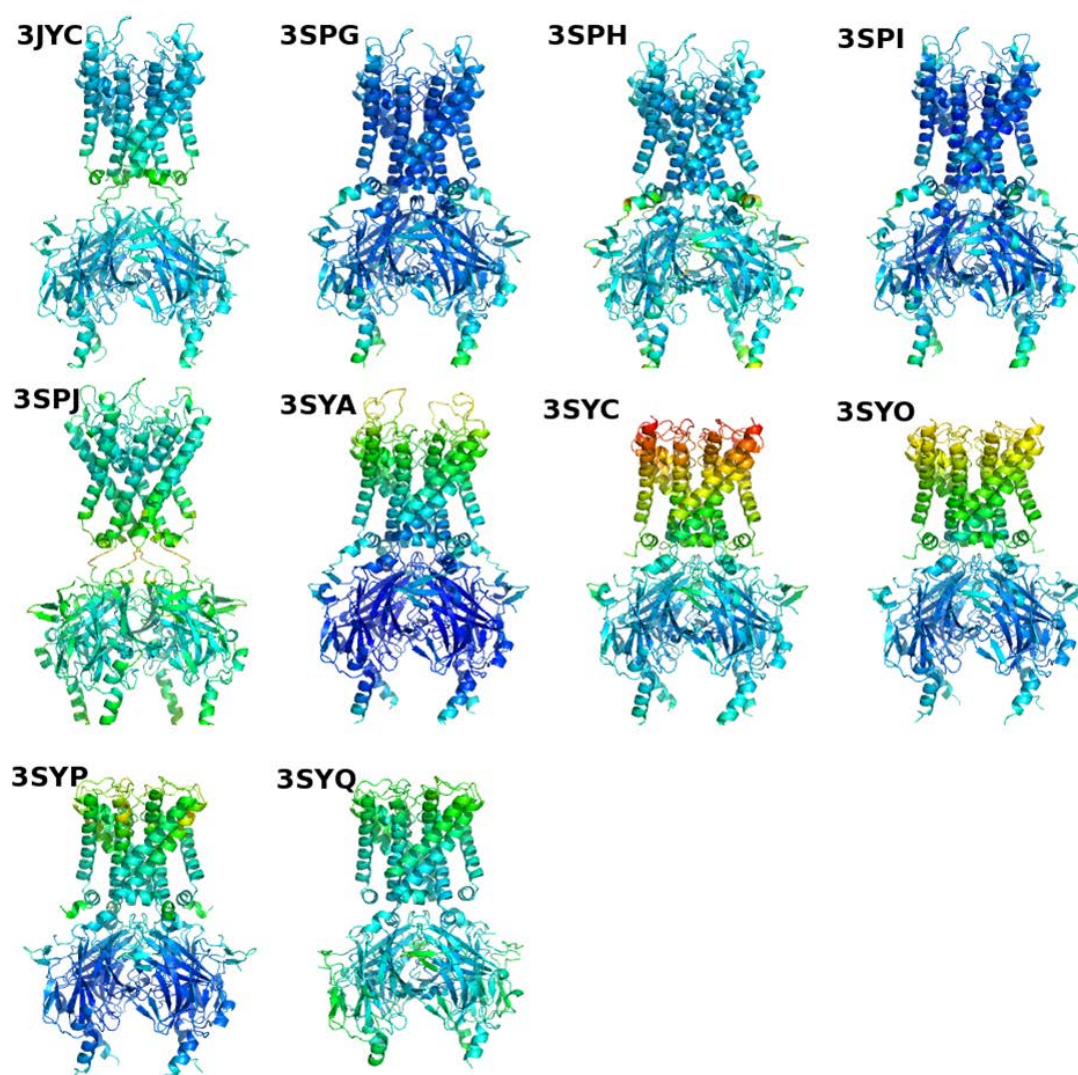

**Fig. S1. Structural diversity of the templates used for constructing the ensemble of ROMK models.** Ten structures representing Kir 2.2 and Kir 3.2 in the presence or absence of different ligands, ions, and functionally important mutations (19-21) are shown in cartoon mode, and labeled with their respective PDB codes. Structures are colored by temperature factor from blue (low B values) to red (high B values).

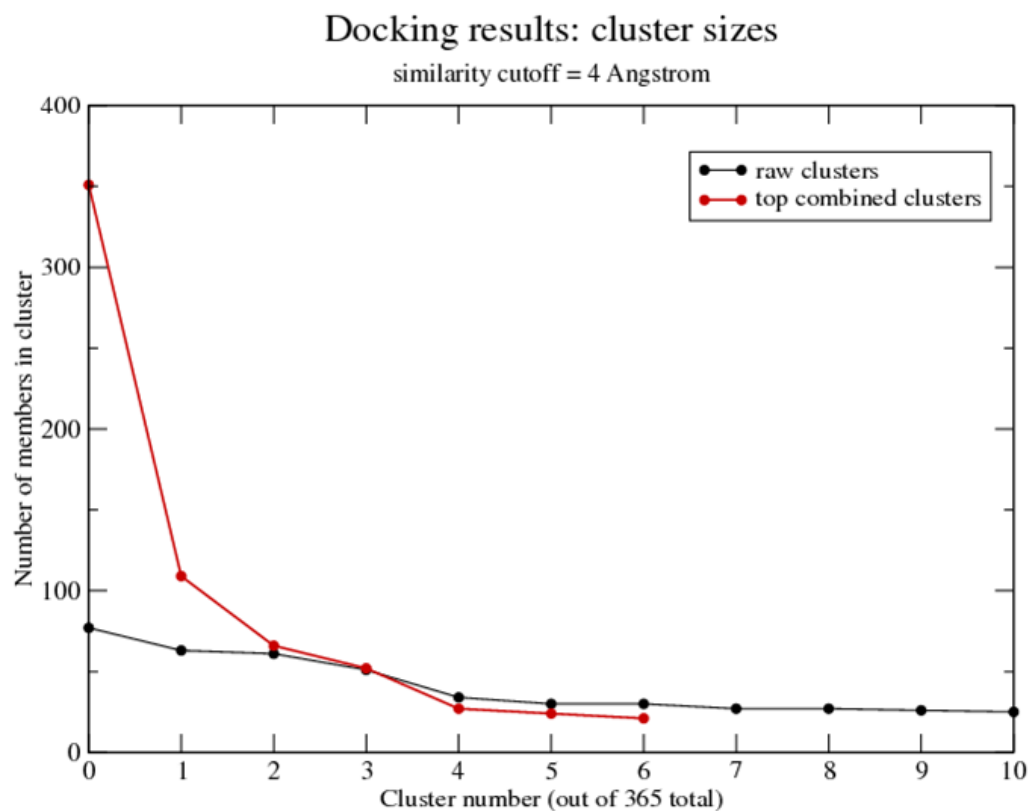

**Fig. S2. Discrimination is improved by combining symmetry-related clusters.** Clustering the docked poses by a similarity metric (RMSD) helps identify the most native-like results, by reducing the effects of noise and uncertainty due to the comparative modeling procedure. We also took advantage of the 4-fold symmetry of the tetrameric channel, combining symmetry-related conformations to produce a smaller number of clusters, in which the two largest stood out from the others.

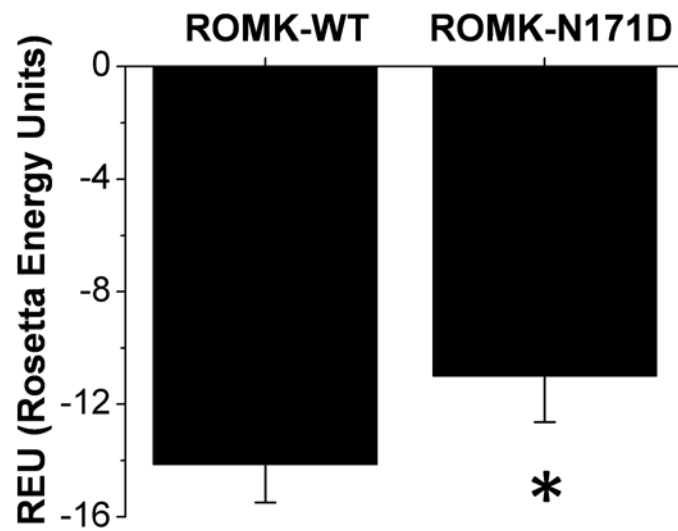

**Fig. S3. In silico prediction of the effect of mutation (N171D) upon inhibitor binding.** The best 10 models of VU591 docked into ROMK were mutated using Rosetta. The models were then minimized and rescored to predict the binding energy. The process was repeated 100 times for each mutated model, and compared to the wild-type models. \* $P = 1.8^{-9}$ .

**Table S1.** Clusters of top docking poses combined by similarity and symmetry relations to increase discriminatory power.

| <i>merged cluster</i> | <i>cluster rank</i> | <i>cluster number</i> | <i>size of cluster</i> | <i>representative</i> | <i>ddG</i> |
|-----------------------|---------------------|-----------------------|------------------------|-----------------------|------------|
| <b>m1 (middle)</b>    |                     |                       | <b>351</b>             |                       |            |
|                       | 1                   | 4399                  | 77                     | 697                   | -10.9698   |
|                       | 2                   | 4455                  | 63                     | 354                   | -13.0003   |
|                       | 3                   | 4440                  | 61                     | 124                   | -11.2989   |
|                       | 4                   | 4418                  | 51                     | 2316                  | -11.4673   |
|                       | 6                   | 4450                  | 30                     | 554                   | -11.1488   |
|                       | 11                  | 4412                  | 25                     | 1219                  | -11.0008   |
|                       | 15                  | 4275                  | 23                     | 1996                  | -10.6223   |
|                       | 16                  | 4485                  | 21                     | 569                   | -10.1381   |
| <b>m2 (upper)</b>     |                     |                       | <b>109</b>             |                       |            |
|                       | 5                   | 4369                  | 34                     | 602                   | -10.238    |
|                       | 7                   | 4303                  | 30                     | 636                   | -10.3281   |
|                       | 10                  | 4374                  | 26                     | 1362                  | -10.8271   |
|                       | 20                  | 4453                  | 19                     | 600                   | -12.0512   |
| <b>m3 (middle2)</b>   |                     |                       | <b>66</b>              |                       |            |
|                       | 14                  | 4404                  | 24                     | 1750                  | -10.2767   |
|                       | 17                  | 4482                  | 21                     | 1359                  | -10.7613   |
|                       | 19                  | 4347                  | 21                     | 1655                  | -11.1465   |
| <b>m4 (lower)</b>     |                     |                       | <b>52</b>              |                       |            |
|                       | 8                   | 4473                  | 27                     | 426                   | -10.8572   |
|                       | 12                  | 4336                  | 25                     | 2058                  | -10.0712   |
| <b>others:</b>        |                     |                       |                        |                       |            |
|                       | 9                   | 4402                  | 27                     | 1580                  | -10.2737   |
|                       | 13                  | 4490                  | 24                     | 2481                  | -12.4143   |
|                       | 18                  | 4472                  | 21                     | 390                   | -11.9424   |

**Table S2.** The distribution of the top 2498 docking results depends on the conformation of the ROMK model.

| <i>template PDB code</i> | <i># in Lower cavity</i> | <i># in Middle cavity</i> | <i>#_in Upper cavity</i> |
|--------------------------|--------------------------|---------------------------|--------------------------|
| <b>3SPG</b>              | 6                        | 73                        | 46                       |
| <b>3SPH</b>              | 32                       | 105                       | 73                       |
| <b>3SPI</b>              | 20                       | 102                       | 80                       |
| <b>3SPJ</b>              | 3                        | 79                        | 142                      |
| <b>3SYA</b>              | 0                        | 151                       | 49                       |
| <b>3SYC</b>              | 0                        | 311                       | 13                       |
| <b>3SYO</b>              | 0                        | 169                       | 92                       |
| <b>3SYP</b>              | 0                        | 250                       | 67                       |
| <b>3SYQ</b>              | 2                        | 157                       | 78                       |
| <b>3SYC</b>              | 16                       | 258                       | 124                      |
